# Supplementary material for: Alternative School Breakfast Service Models and Associations with Breakfast Participation, Diet Quality, Body Mass Index, Attendance, Behavior, and Academic Performance: A Systematic Review
Source: MDPI journal article supplement (doi:10.3390/nu15132951), 2023-06-29
Supplement: s1 [file s1]

**Table S2.** Quality assessment of cross-sectional studies based on the Newcastle-Ottawa Scale for studies based on alternative school breakfast service models.

| Author, Year         | Representative Sample <sup>1</sup> (+) | Sample Size Justified <sup>2</sup> (+) | Ascertainment of exposure/risk factor <sup>3</sup> (++) | Non-respondents <sup>4</sup> (+) | Comparability of subjects; confounding factors controlled <sup>5</sup> (++) | Assessment of outcome <sup>6</sup> (++) | Statistical test <sup>7</sup> (+) | Total Score (max 10) | Risk of bias <sup>8</sup> |
|----------------------|----------------------------------------|----------------------------------------|---------------------------------------------------------|----------------------------------|-----------------------------------------------------------------------------|-----------------------------------------|-----------------------------------|----------------------|---------------------------|
| Bartfeld, 2010 [14]  | +                                      | +                                      | ++                                                      |                                  | ++                                                                          |                                         | +                                 | 7                    | Low                       |
| Baxter, 2010 [17]    | +                                      | +                                      | ++                                                      |                                  | ++                                                                          | ++                                      | +                                 | 9                    | Low                       |
| Gottfried, 2022 [27] | +                                      | +                                      | ++                                                      |                                  | ++                                                                          | ++                                      | +                                 | 9                    | Low                       |
| Soldavini, 2019 [44] | +                                      | +                                      | ++                                                      |                                  | +                                                                           | ++                                      | +                                 | 8                    | Low                       |
| Sweeney, 2006 [45]   | +                                      | +                                      |                                                         | +                                |                                                                             |                                         |                                   | 3                    | Very high                 |
| Van Wye, 2013 [46]   | +                                      | +                                      | +                                                       | +                                | +                                                                           | +                                       |                                   | 6                    | High                      |

<sup>1</sup> **Representative sample:** Evidence the sample is representative of target population (+) versus convenience sample or no description.

<sup>2</sup> **Sample size justified:** Justification provided or satisfactory sample size (>100 participants) (+) versus no information provided or not satisfactory (<100 participants).

<sup>3</sup> **Ascertainment of exposure/risk factor:** Objective assessment (++) , validated non-objective measure (+), versus non-objective and non-validated measure.

<sup>4</sup> **Non-respondents:** Proportion of target population recruited attained pre-specified target or basic summary of non-respondent characteristics in sampling frame provided (+) versus unsatisfactory recruitment rate or no summary data on non-respondents or no information provided.

<sup>5</sup> **Comparability of subjects in different outcome groups; Confounding factors controlled:** Comparability of subjects in different outcome groups on the basis of design/analyses or analyses adjusted for relevant predictors/risk factors/confounders (++) versus information not provided or analyses not adjusted for all relevant confounders/risk factors.

<sup>6</sup> **Assessment of outcome:** Objective assessment (++) , validated non-objective measure (+), versus non-objective and non-validated measure.

<sup>7</sup> **Statistical test:** Statistical tests used to analyse the data clearly described and appropriate and measures of association presented include confidence intervals and/or probability level (p value) (+) versus statistical tests not appropriate, not described, or incomplete

<sup>8</sup> **Total score for the Newcastle–Ottawa Scale (NOS) for assessing the quality of non-randomized studies is attributed to a following categories:** very high risk of bias (0–3 NOS points and/or no statistical analyses conducted), high risk of bias (4–6 NOS points), and low risk of bias (7–10 NOS points)
