# Supplementary material for: Alternative School Breakfast Service Models and Associations with Breakfast Participation, Diet Quality, Body Mass Index, Attendance, Behavior, and Academic Performance: A Systematic Review
Source: MDPI journal article supplement (doi:10.3390/nu15132951), 2023-06-29
Supplement: s1 [file s1]

**Table S1.** Quality assessment of cohort and quasi-experimental studies based on the Newcastle-Ottawa Scale for studies based on alternative school breakfast service models.

| Author, Year              | Satisfactory Sample <sup>1</sup> (++) | Comparison Group <sup>2</sup> (+) | Comparability of subjects; confounding factors controlled <sup>3</sup> (++) | Outcome measured at baseline <sup>4</sup> (+) | Assessment of outcome <sup>5</sup> (++) | Statistical test <sup>6</sup> (++) | Total Score (max 10) | Risk of bias <sup>7</sup> |
|---------------------------|---------------------------------------|-----------------------------------|-----------------------------------------------------------------------------|-----------------------------------------------|-----------------------------------------|------------------------------------|----------------------|---------------------------|
| Abouk, 2022 [12]          | ++                                    | +                                 | ++                                                                          | +                                             | ++                                      | ++                                 | 10                   | Low                       |
| Anzman-Frasca, 2015 [13]  | ++                                    | +                                 | ++                                                                          | +                                             | ++                                      | ++                                 | 10                   | Low                       |
| Bartfeld, 2019 [15]       | ++                                    | +                                 | ++                                                                          | +                                             | ++                                      | ++                                 | 10                   | Low                       |
| Bauer, 2020 [16]          | ++                                    | +                                 | ++                                                                          | +                                             |                                         | ++                                 | 8                    | Low                       |
| Bernstein, 2004 [18]      | ++                                    | +                                 | +                                                                           | +                                             | +                                       | +                                  | 7                    | Low                       |
| Bullock, 2021 [19]        | ++                                    | +                                 | ++                                                                          | +                                             | ++                                      | +                                  | 9                    | Low                       |
| Conklin, 2004 [20]        | +                                     |                                   |                                                                             | +                                             | ++                                      | +                                  | 5                    | High                      |
| Corcoran, 2016 [21]       | ++                                    | +                                 | ++                                                                          | +                                             | ++                                      | ++                                 | 10                   | Low                       |
| Cuadros-Menaca, 2022 [22] | ++                                    | +                                 | ++                                                                          | +                                             | ++                                      | ++                                 | 10                   | Low                       |
| Cuadros-Menaca, 2022 [23] | ++                                    | +                                 | +                                                                           | +                                             | ++                                      | ++                                 | 9                    | Low                       |
| Cuadros-Menaca, 2022 [24] | ++                                    | +                                 | +                                                                           | +                                             | +                                       |                                    | 6                    | High                      |
| Farris, 2019 [25]         | ++                                    |                                   |                                                                             | +                                             | +                                       | +                                  | 5                    | High                      |
| Ferris, 2022 [26]         | ++                                    | +                                 | ++                                                                          | +                                             | ++                                      | ++                                 | 10                   | Low                       |
| Grannon, 2019 [28]        | ++                                    | +                                 | +                                                                           | +                                             | ++                                      | ++                                 | 9                    | Low                       |
| Guinn, 2014 [29]          | ++                                    | +                                 | +                                                                           |                                               | ++                                      | ++                                 | 8                    | Low                       |
| Hearst, 2019 [30]         | ++                                    | +                                 | ++                                                                          | +                                             | ++                                      | ++                                 | 10                   | Low                       |
| Imberman, 2014 [31]       | ++                                    | +                                 | ++                                                                          | +                                             | ++                                      | ++                                 | 10                   | Low                       |
| Kirksey, 2021 [32]        | ++                                    | +                                 | ++                                                                          | +                                             | ++                                      | ++                                 | 10                   | Low                       |
| Larson, 2018 [33]         | ++                                    | +                                 | +                                                                           | +                                             | ++                                      | ++                                 | 9                    | Low                       |
| Luan, 2021 [34]           | ++                                    | +                                 | ++                                                                          | +                                             | ++                                      | ++                                 | 10                   | Low                       |
| McLaughlin, 2002 [35]     | +                                     | +                                 | ++                                                                          | +                                             | ++                                      | ++                                 | 9                    | Low                       |
| Moeltner, 2018 [36]       | +                                     | +                                 | +                                                                           | +                                             | +                                       | +                                  | 6                    | High                      |
| Murphy, 2000 [37]         | ++                                    | +                                 |                                                                             | +                                             | ++                                      | +                                  | 7                    | Low                       |
| Nanney, 2011 [39]         | +                                     |                                   |                                                                             | +                                             | ++                                      | ++                                 | 6                    | High                      |
| Nanney, 2019 [38]         | ++                                    | +                                 | ++                                                                          | +                                             | ++                                      | ++                                 | 10                   | Low                       |
| Olsta, 2013 [40]          | +                                     |                                   |                                                                             | +                                             | ++                                      |                                    | 4                    | High                      |
| Polonsky, 2019 [41]       | ++                                    | +                                 | ++                                                                          | +                                             | ++                                      | ++                                 | 10                   | Low                       |

|                         |    |   |    |   |    |    |    |     |
|-------------------------|----|---|----|---|----|----|----|-----|
| Ritchie, 2015 [42]      | ++ | + | ++ | + | +  | ++ | 9  | Low |
| Schanzenbach, 2014 [43] | ++ | + | ++ | + | ++ | ++ | 10 | Low |
| Walker, 2021 [47]       | ++ | + | ++ | + | ++ | +  | 9  | Low |
| Yeh, 2022 [48]          | ++ | + | ++ | + | ++ | +  | 9  | Low |

<sup>1</sup> **Sample size satisfactory:** Satisfactory simple size (>100 units of analysis (e.g., trays, students, classrooms, schools) AND three or more schools in the intervention condition (++) , Satisfactory simple size (>100 units of analysis (e.g., trays, students, classrooms, schools) OR three or more schools in the intervention condition (+), versus no information provided or not satisfactory (<100 participants and fewer than three schools in the intervention condition).

<sup>2</sup> **Comparison group:** An unexposed group serves as a comparison for the intervention condition (+) versus no comparison group.

<sup>3</sup> **Comparability of groups; Confounding factors controlled:** Comparability of subjects in different outcome groups and analyses adjusted for relevant predictors/risk factors/confounders, including repeated measures, where appropriate (++) , adjusted for some but not all relevant predictors/risk factors/ confounders (+), versus information not provided or analyses not adjusted for relevant predictors/risk factors/ confounders.

<sup>4</sup> **Outcome measured at baseline:** Baseline measurements collected (+) versus no baseline assessments.

<sup>5</sup> **Assessment of outcome:** Objective assessment (plate waste) (++) , validated non-objective measure (visual estimation; dietary recall) (+), versus non-objective and non-validated measure (aggregate plate waste is not a valid approach).

<sup>6</sup> **Statistical test:** Statistical tests used to analyze the data clearly described and appropriate, measures of association presented include confidence intervals and/or probability level (p value) AND statistical tests account for clustering of observations, where appropriate (++) , Statistical tests used to analyze the data clearly described and appropriate, measures of association presented include confidence intervals and/or probability level (p value), OR statistical tests account for clustering of observations, where appropriate (+), versus statistical tests not appropriate, not described, or incomplete.

<sup>7</sup> **Total score for the Newcastle–Ottawa Scale (NOS) is attributed to a following categories:** very high risk of bias (0–3 NOS points), high risk of bias (4–6 NOS points), and low risk of bias (7–10 NOS points)
